# Supplementary material for: Ideal strength and elastic instability in single-layer 8-Pmmn borophene
Source: Royal Society of Chemistry journal article supplement (doi:10.1039/c6ra28454j), 2017-01-01
Supplement: c6ra28454j1.pdf [file c6ra28454j1.pdf]

## Electronic supplementary information

### Ideal strength and elastic instability in single-layer 8-*Pmmn* Borophene

**Junhui Yuan,<sup>a</sup> Niannian Yu,<sup>b</sup> Kanhao Xue,\*<sup>a</sup> Xiangshui Miao<sup>a</sup>**

*<sup>a</sup>School of Optical and Electronic Information, Huazhong University of Science and Technology, Wuhan, Hubei, 430074, China*

*<sup>b</sup>School of Science, Wuhan University of Technology, Wuhan, Hubei, 430070, China*

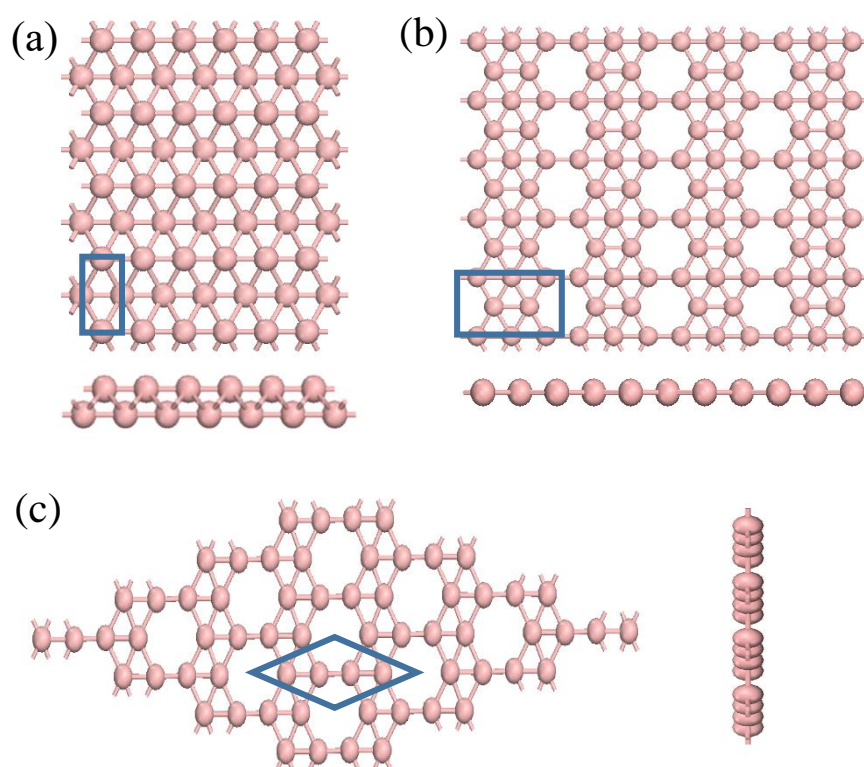

**Fig. ESI1** Top view and side view of (a) striped, (b)  $\beta_{12}$  and (c)  $\chi_3$  borophene.

**Table ESI1** Calculated lattice constant  $a$  and  $b$ , buckling height  $h$ , and energy  $E$  of 8- $Pmmn$ , stripe,  $\beta_{12}$  and  $\chi_3$  borophene. Previous theoretical data are also listed for comparison.

| Structure                            | $a$ (Å) | $b$ (Å) | $h$ (Å) | $E$ (eV/atom) | $E_c$ (eV/atom) |
|--------------------------------------|---------|---------|---------|---------------|-----------------|
| 8- $Pmmn$ borophene                  | 4.523   | 3.258   | 2.18    | -6.325        | -6.038          |
| Ref. 1                               | 4.52    | 3.26    | --      | -6.394        | --              |
| stripe borophene                     | 1.614   | 2.868   | 0.907   | -6.187        | -5.900          |
| $\beta_{12}$ borophene               | 5.070   | 2.928   | 0       | -6.232        | -5.945          |
| $\chi_3$ borophene                   | 4.459   | 4.459   | 0       | -6.244        | -5.957          |
| stripe borophene <sup>13</sup>       | 1.614   | 2.866   | 0.911   | --            | -6.099          |
| stripe borophene <sup>1</sup>        | 1.61    | 2.87    | --      | -6.242        | --              |
| $\beta_{12}$ borophene <sup>13</sup> | 5.07    | 2.93    | 0       | --            | -6.147          |
| $\beta_{12}$ borophene <sup>1</sup>  | 5.08    | 2.92    | --      | -6.282        | --              |
| $\chi_3$ borophene <sup>13</sup>     | 4.45    | 4.45    | 0       | --            | -6.159          |

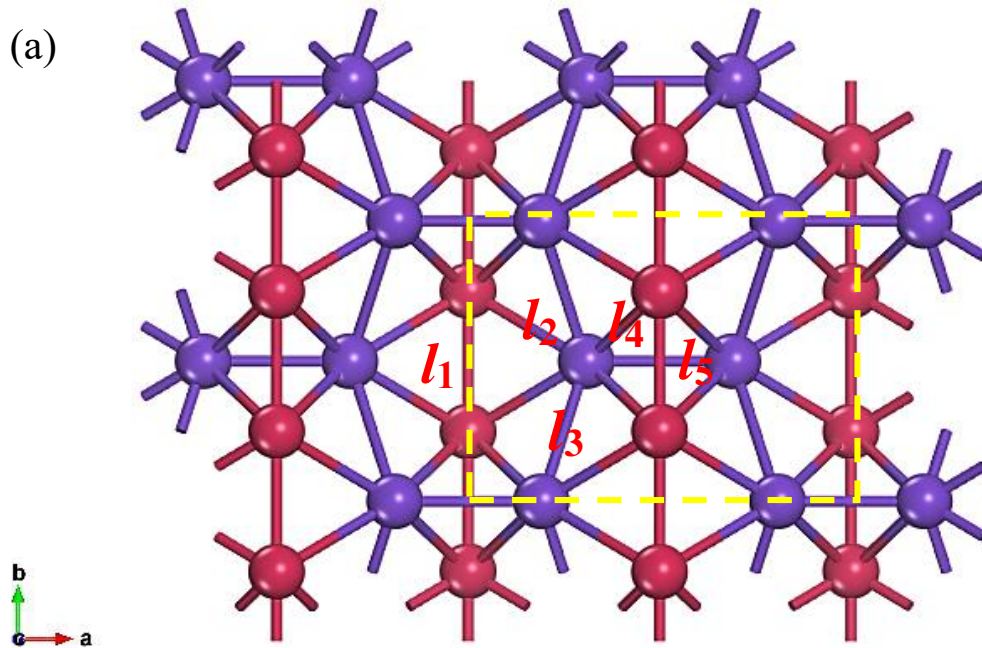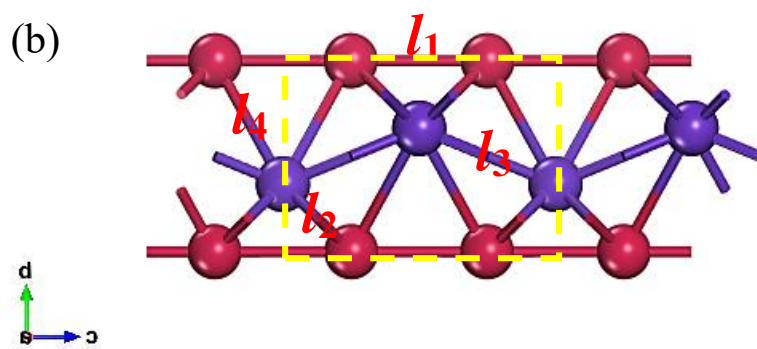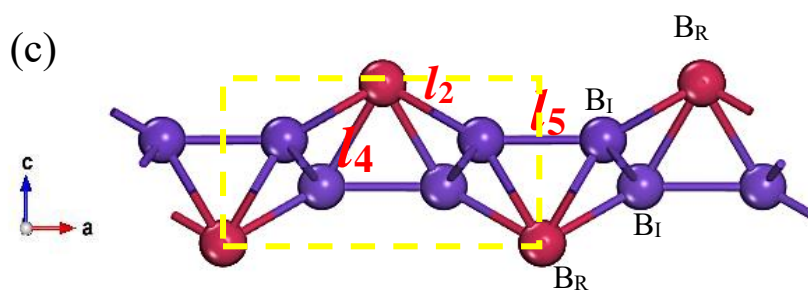

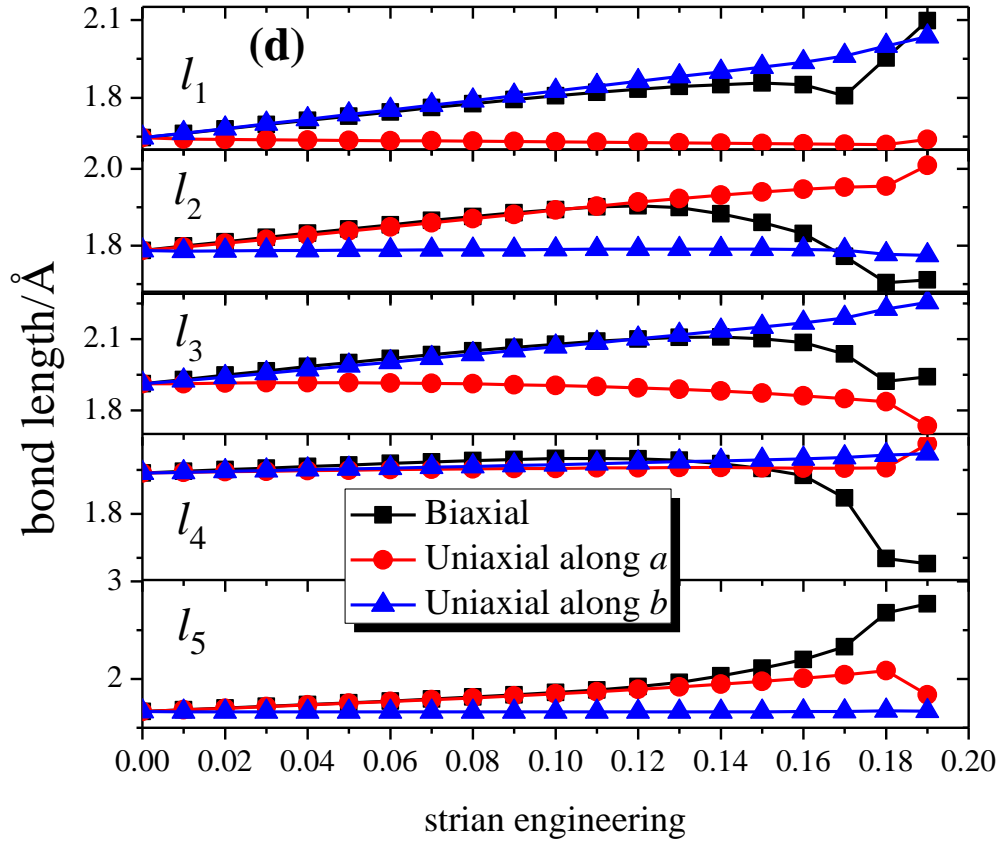

**Fig. ESI2** The calculated bond length of 8-*Pmmn* borophene. The five types B-B bonds ( $l_1$ ,  $l_2$ ,  $l_3$ ,  $l_4$ ,  $l_5$ ) are shown in Fig.ESI2 (a), (b) and (c); the corresponding B-B bond length is shown in Fig.ESI2 (d). The  $l_1$  represent  $B_R$ - $B_R$  bond length,  $l_2$  and  $l_4$  represent two different  $B_R$ - $B_I$  bond lengths,  $l_3$  and  $l_5$  represent two different  $B_I$ - $B_I$  bond lengths.

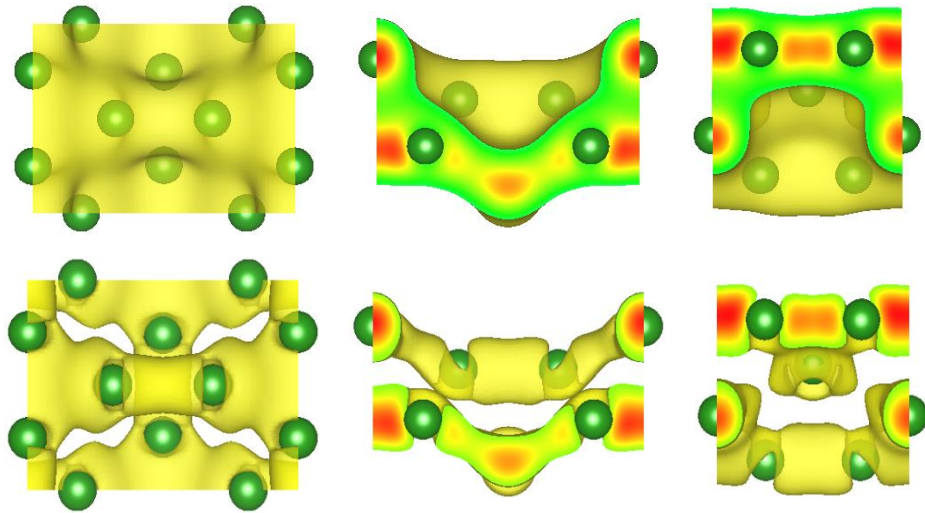

(a) Intrinsic

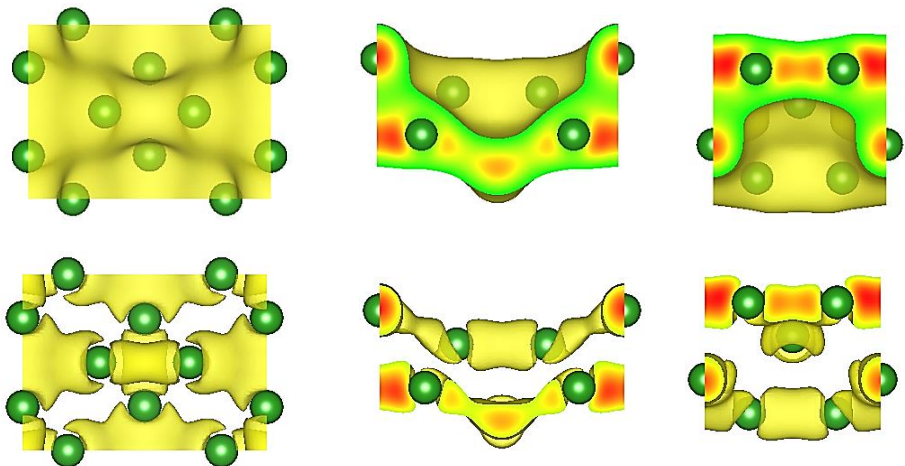

$\varepsilon = 0.04$

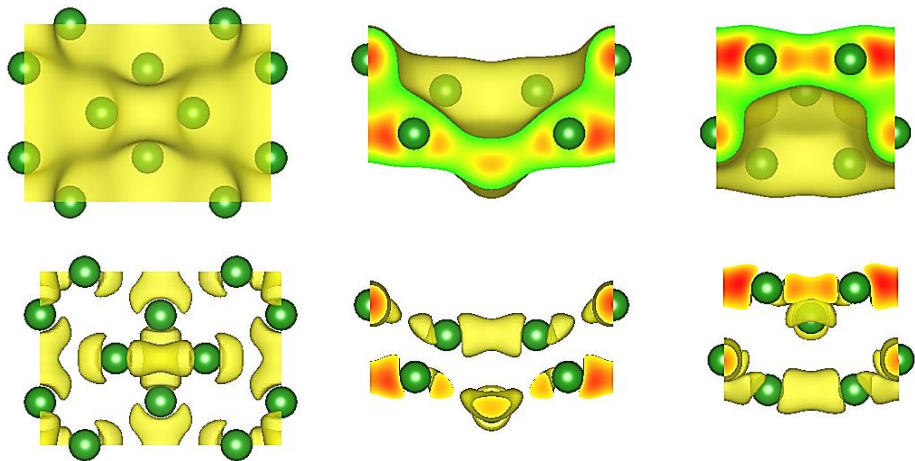

$\varepsilon = 0.08$

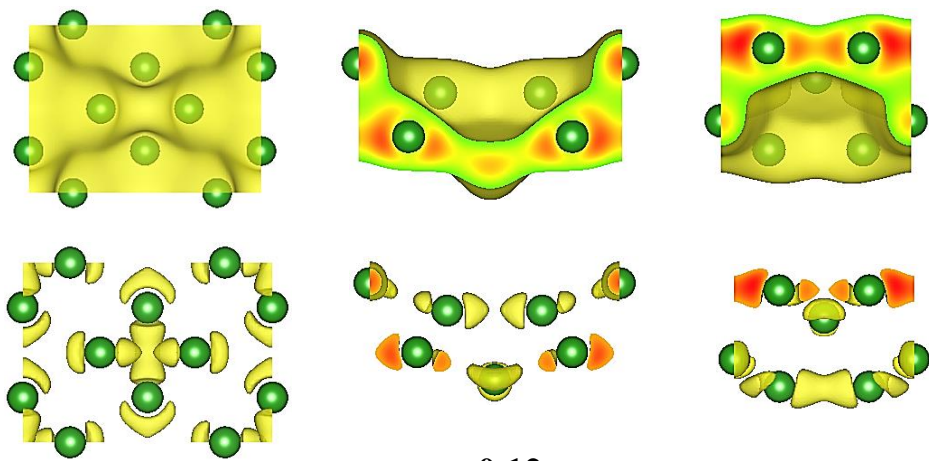

$\epsilon = 0.12$

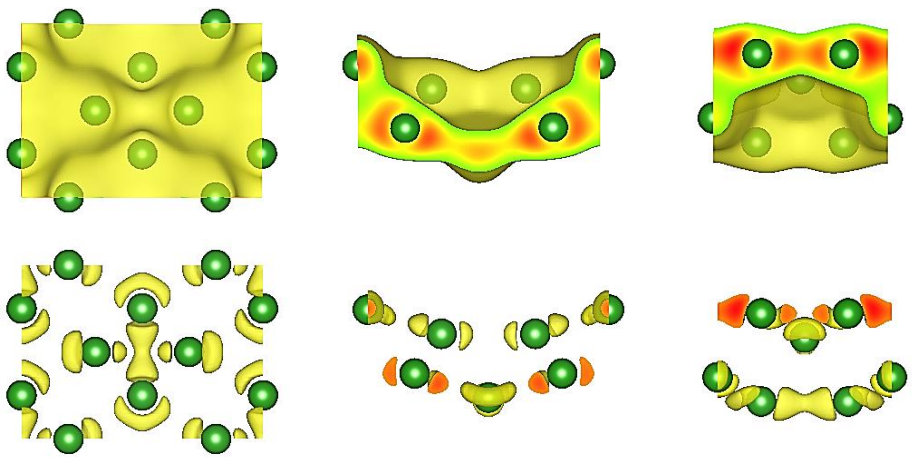

$\epsilon = 0.135$

(b) Biaxial strain ( $\epsilon = 0.04, 0.08, 0.12, 0.135$ )

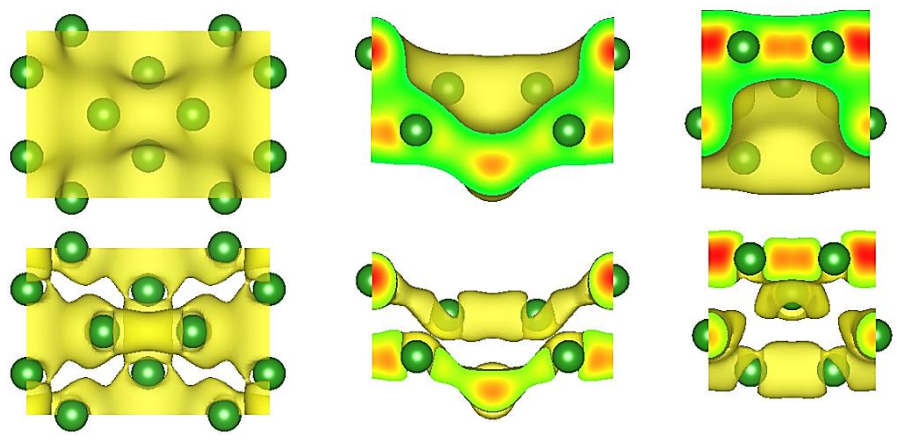

$\epsilon = 0.04$

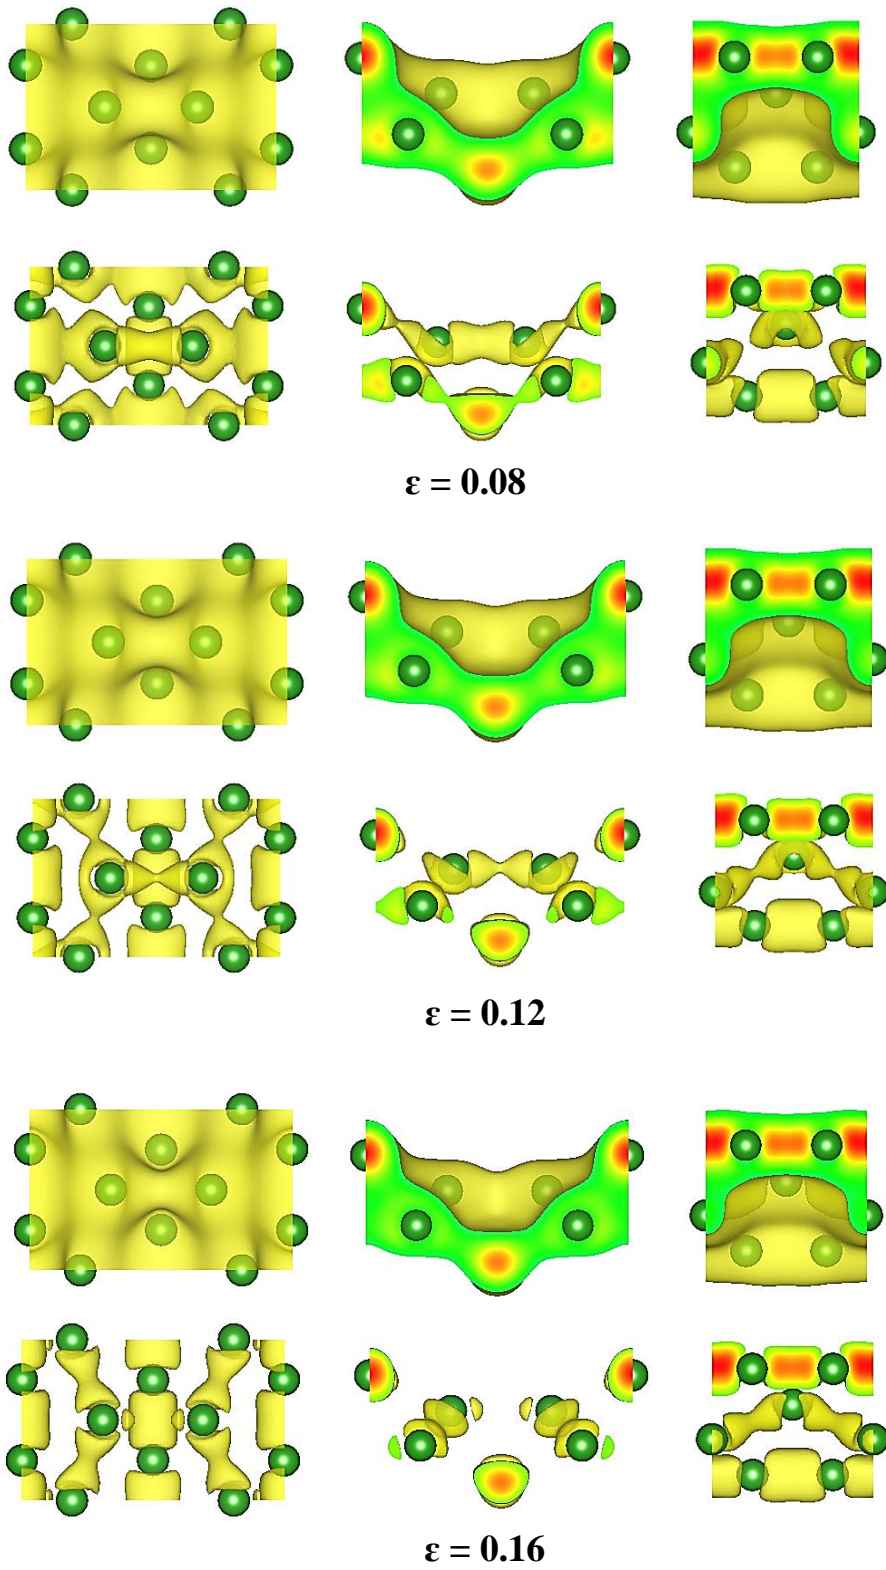

(c) Uniaxial strain along  $a$  ( $\varepsilon = 0.04, 0.08, 0.12, 0.16$ )



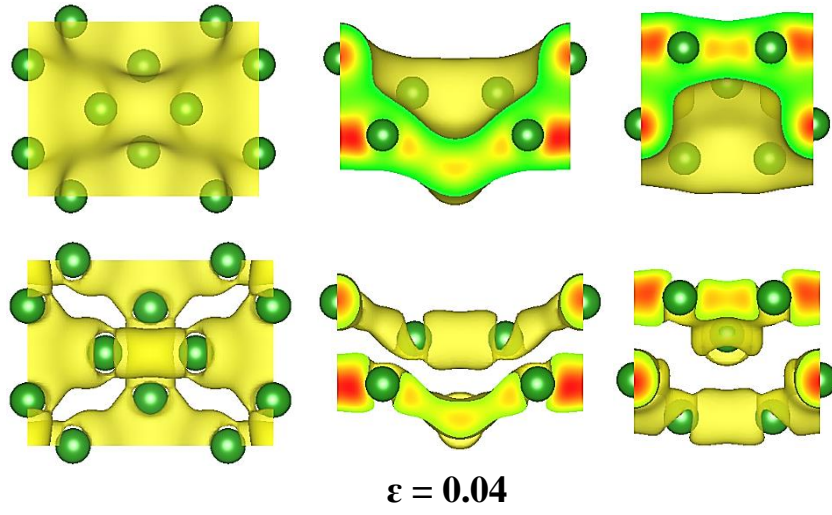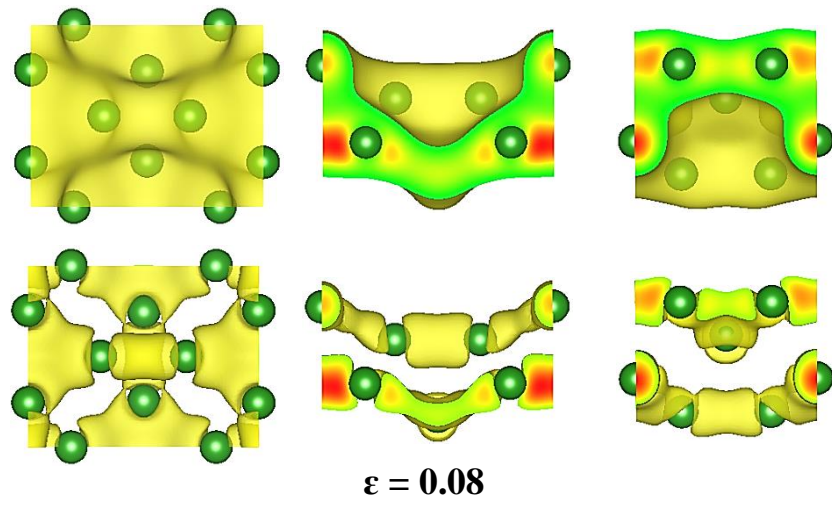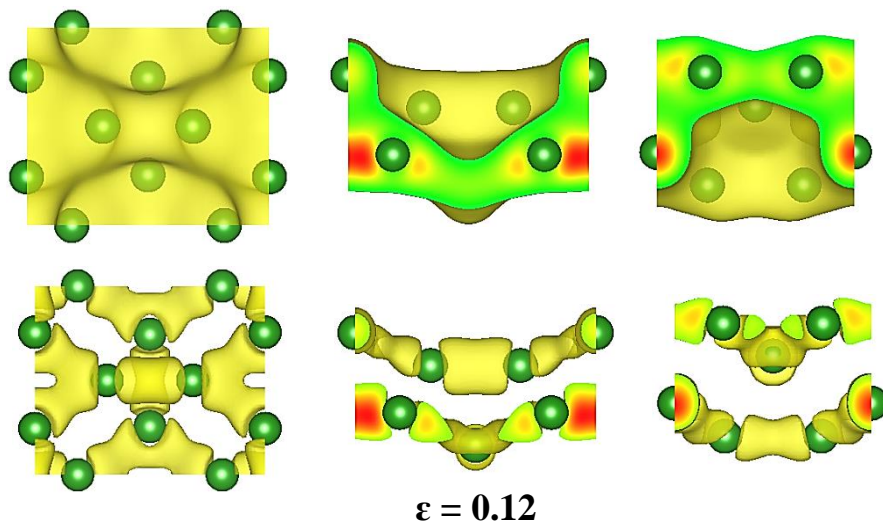

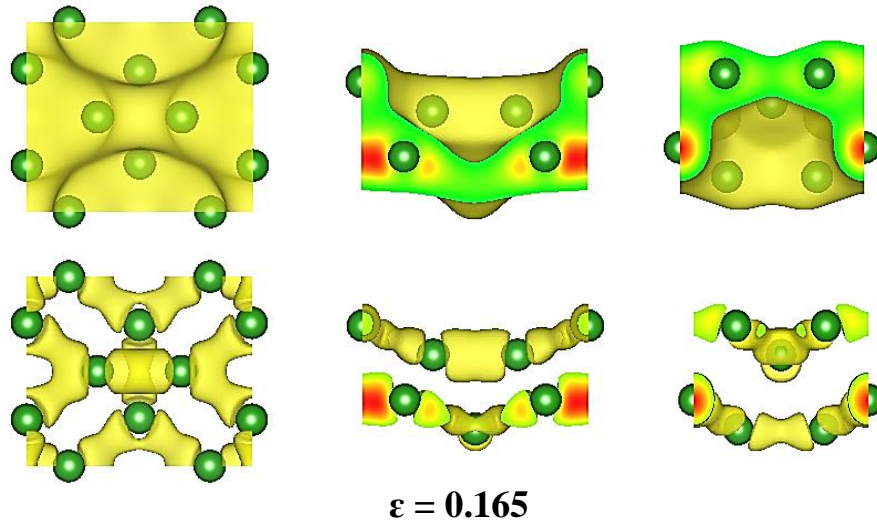

**(d) Uniaxial strain along  $b$  ( $\varepsilon = 0.04, 0.08, 0.12, 0.165$ )**

**Fig. ESI3** The calculated valence electron density of 8-*Pmmn* borophene under three types of strain with two different isosurfaces. The isosurfaces of upper panel is  $0.07 \text{ e/bohr}^3$ , the lower panel is  $0.10 \text{ e/bohr}^3$ , respectively. (a) (001), (010) and (100) plane without strain; (b) (001), (010) and (100) plane under biaxial strain; (c) (001), (010) and (100) plane under uniaxial along  $a$  direction; (d) (001), (010) and (100) plane under uniaxial along  $b$  direction.

## References

- [1] Ma F, Jiao Y, Gao G, et al. Graphene-like Two-dimensional Ionic Boron with Double Dirac Cones at Ambient Condition[J]. Nano Letters, 2016, 16(5):3022.
